# Supplementary material for: Smell and taste changes are early indicators of the COVID-19 pandemic and political decision effectiveness
Source: PubMed Central journal article supplement (PMC7560893; doi:10.1038/s41467-020-18963-y), 2020-10-14
Supplement: 41467_2020_18963_MOESM1_ESM.pdf [file 41467_2020_18963_MOESM1_ESM.pdf]

## Supplementary Figures

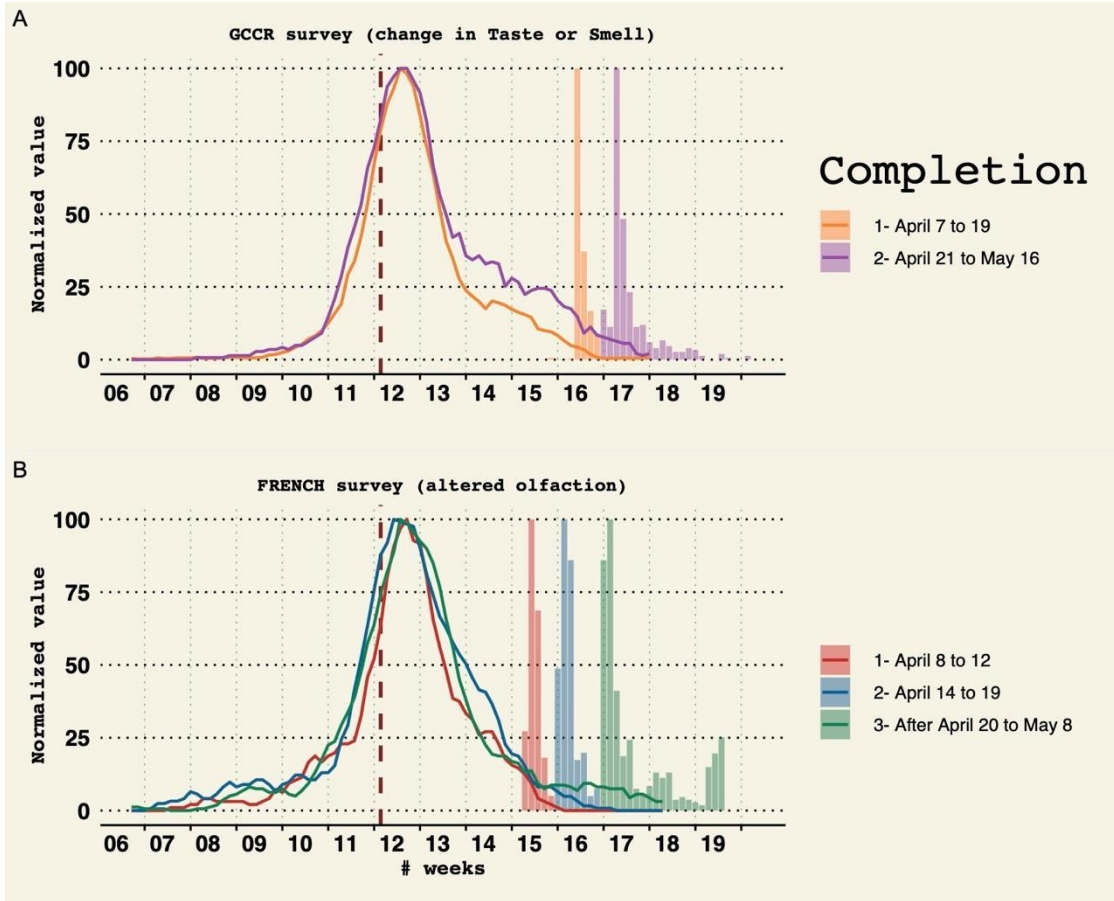

2

3 **Supplementary Figure 1.** *Evaluation of the robustness of reported smell and taste changes over time.*

4 *Colored lines represent the proportion of reported onset of smell and taste change normalized to the*

5 *highest value of each series. The barplot indicates the proportion of the date of completion of the survey*

6 *(normalized to the highest value of each series). Colors represent groups of participants according to*

7 *completion time. French lockdown is represented by the vertical brown dashed line. A) Peaks of*

8 *smell/taste changes in the French participants who answered the GCCR questionnaire according to*

9 *different dates of completion (before or after April 20). B) Date distribution of an independent French*

10 *survey performed on 950 individuals and focusing on smell alterations in the French population*

11 *independently of COVID-19 (see **Methods**).*

12

1  
2

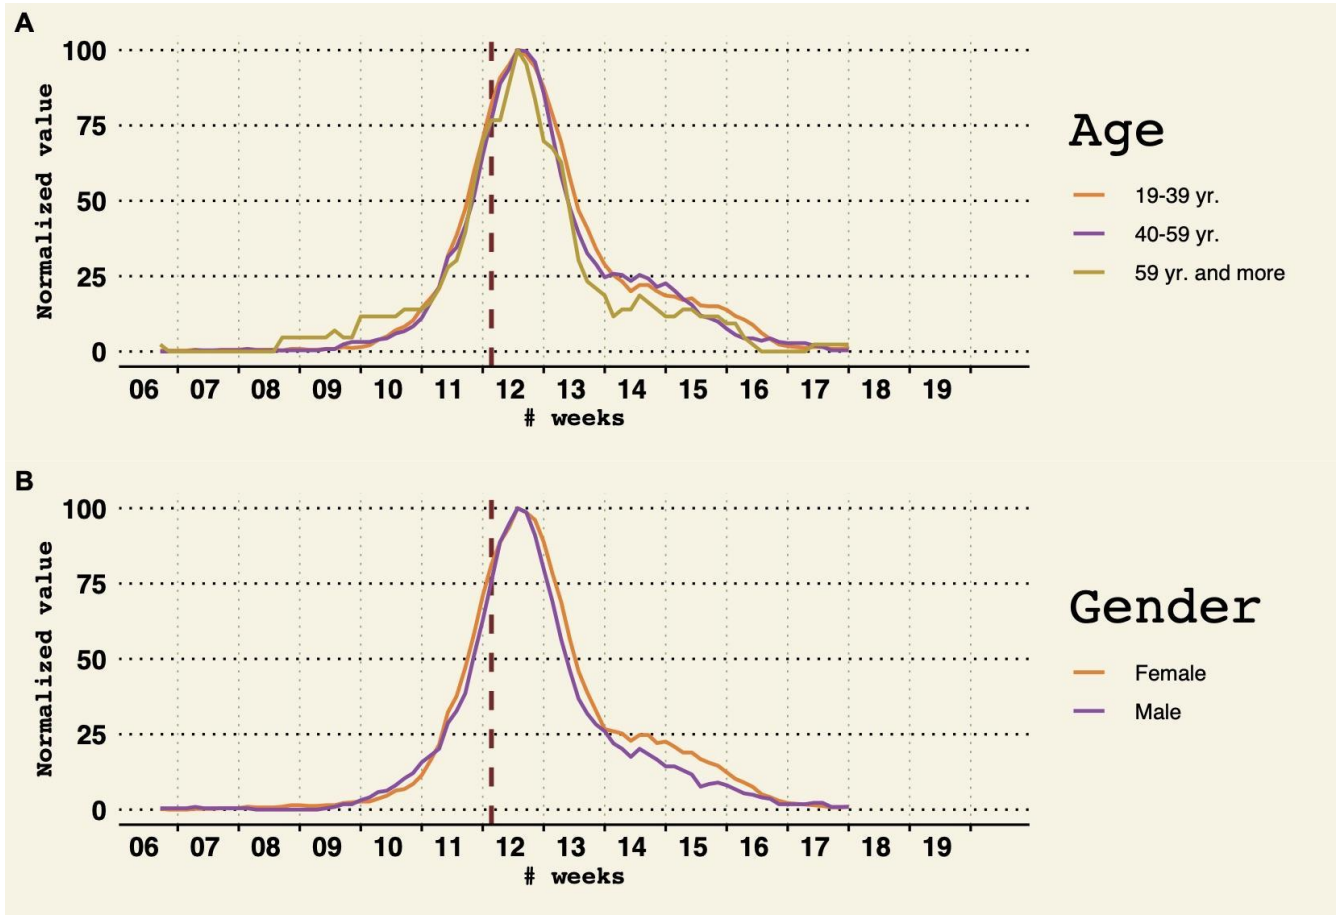

3  
4  
5  
6  
7  
8

**Supplementary Figure 2.** Time of peaks of smell/taste changes in French participants who answered the GCCR questionnaire according to their age or gender. Similarly to figure S1, colored lines represent the proportion of reported onset of smell and taste normalized to the highest value of each series. Colors represent groups of participants according to age (S2.A) or gender (S2.B).

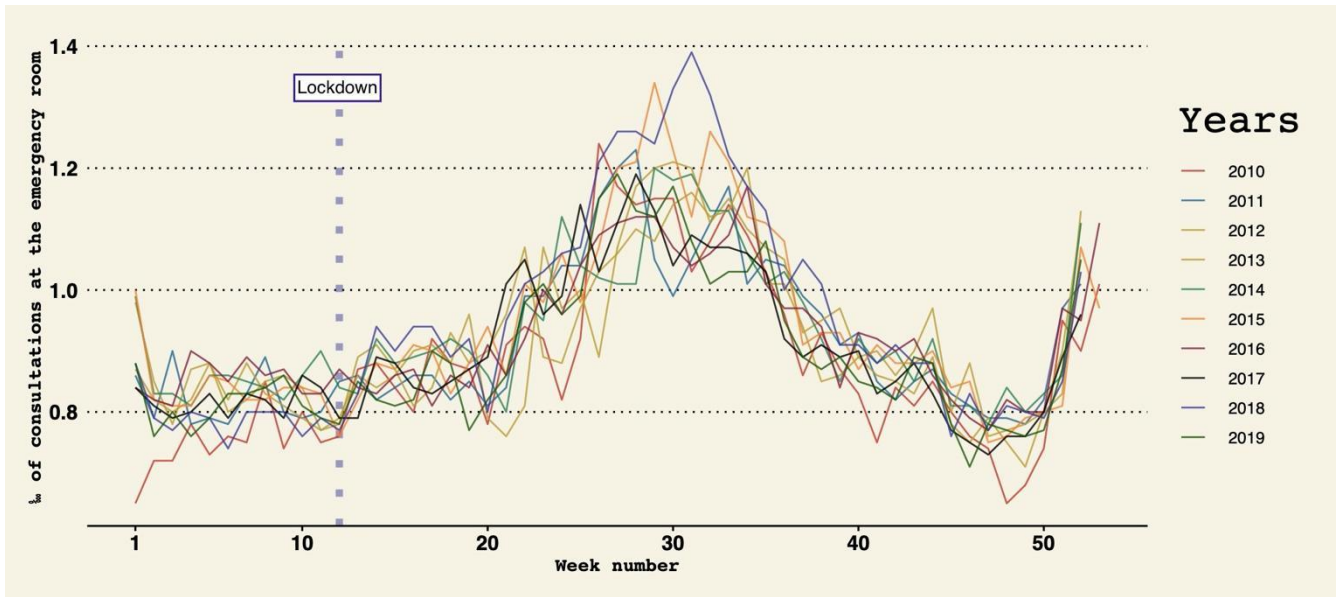

1

2

3 **Supplementary Figure 3.** Evolution of the ratio of consultation for allergies in the emergency room (for  
 4 10,000 consultation) over time during the last 10 years. The start of the 2020 lockdown is represented  
 5 by the vertical blue line.

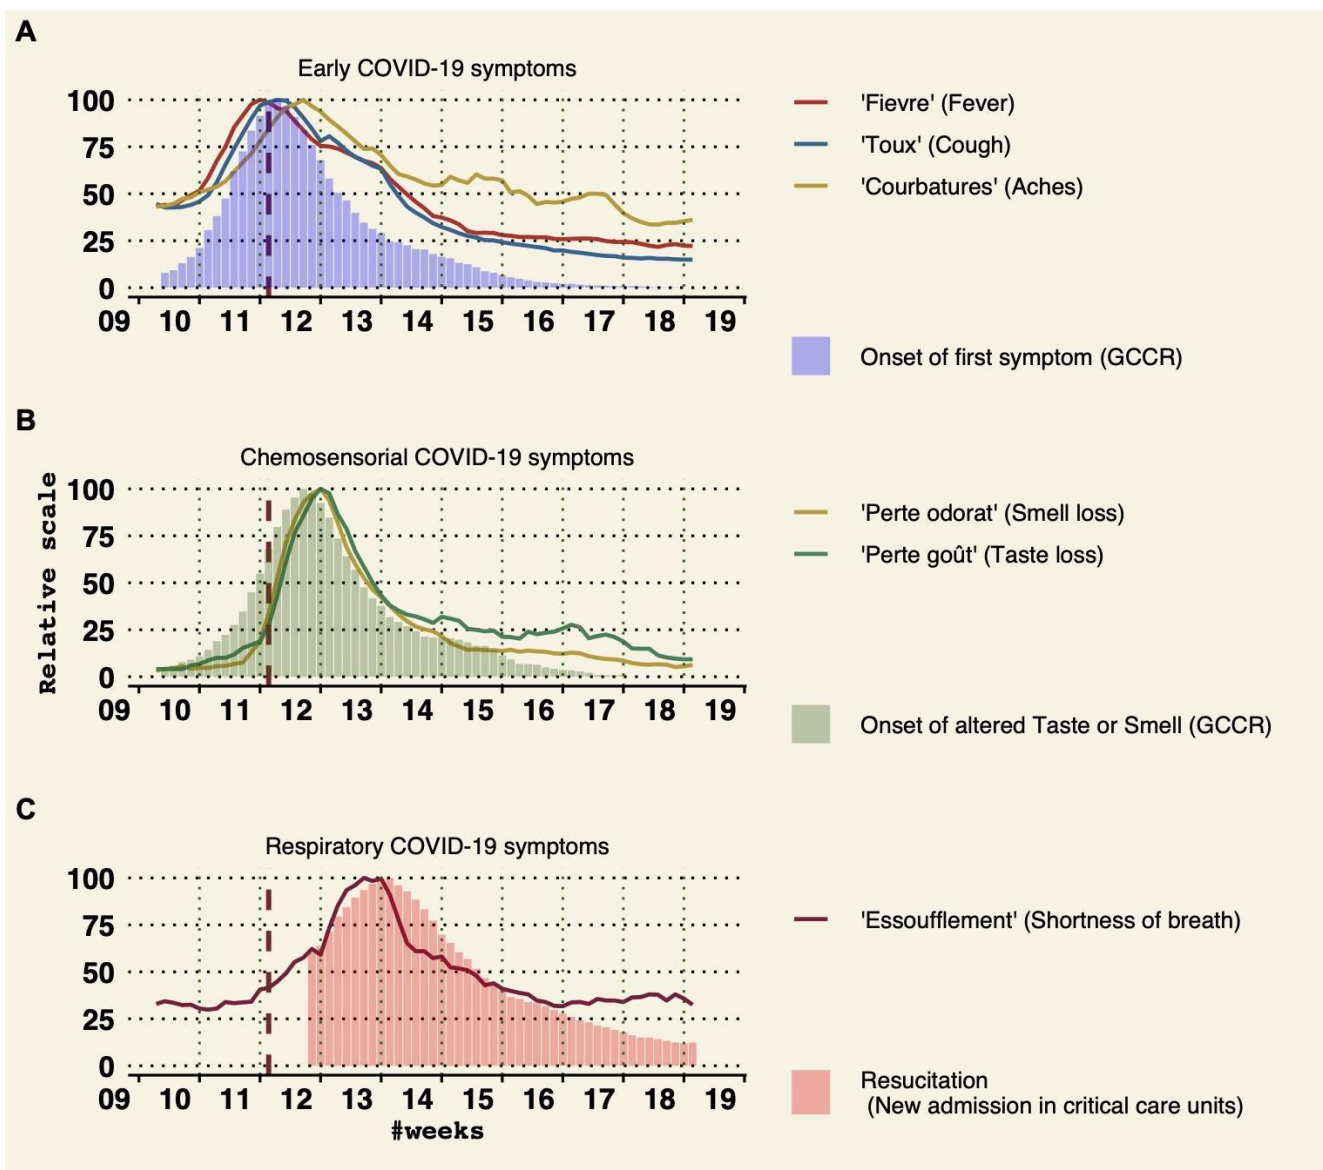

1

2

3 **Supplementary Figure 4.** Google trends in France for COVID-19 symptoms. The French lockdown  
 4 start is shown by a brown dashed line. **A)** The peak of the onset of first symptoms declared in the GCCR  
 5 survey (blue bars, 1 day after the lockdown) corresponds to peaks of online queries for fever (red line),  
 6 cough (blue line) and aches (yellow line). **B)** The peak of onset of altered smell/taste (green bars, 4 days  
 7 after the lockdown) corresponds to peaks of online queries for “smell loss” (yellow) and “taste loss”  
 8 (green). **C)** Online queries for “shortness of breath” (red curve) preceded the peak of the number of  
 9 admissions to CCRU by three days.

1 **Supplementary Tables**

2

3 **Supplementary Table 1 : Data exclusions and Sampling strategy**

|                                                                                | <b>n</b>    |
|--------------------------------------------------------------------------------|-------------|
| <b>Total GCCR participants</b>                                                 | 41759       |
| <b>Answering Smell change question</b>                                         | 18118       |
| <b>Change in SMELL or TASTE</b>                                                | 15872       |
| <b>Residents in France - ITALY - UK</b>                                        | 7929        |
| <b>With date onset of first symptom</b>                                        | 6784        |
| <b>FIGURE 1 :</b>                                                              |             |
| French resident with onset of first symptom between 03-01-2020 and 05-11-2020  | 3832        |
| France resident with information regarding the onset of Smell/taste change     | 1476        |
| <b>FIGURE 2 :</b>                                                              |             |
| FRANCE With date onset of first symptom between 02-01-2020 and 05-11_2020      | <b>4720</b> |
| ITALY With date onset of first symptom between 02-01-2020 and 05-11_2020       | <b>1241</b> |
| UK With date onset of first symptom between 02-01-2020 and 05-11_2020          | <b>750</b>  |
| FRANCE with date onset of SMELL/TASTE change between 02-01-2020 and 05-11_2020 | <b>1487</b> |
| ITALY with date onset of SMELL/TASTE change between 02-01-2020 and 05-11_2020  | <b>264</b>  |
| UK with date onset of SMELL/TASTE change between 02-01-2020 and 05-11_2020     | <b>243</b>  |

4

1 **Supplementary Table 2: Test of associations between putative indicators**  
 2 *Test for association between paired samples, using one of Pearson's product moment correlation*  
 3 *coefficient, without correction for multiple comparisons. (IDF= Ile de France, capital region fo France,*  
 4 *"GCCR participants" =participant to the present study)*

| variableX                                                  | variableY       | p        | cor | type | level                      |
|------------------------------------------------------------|-----------------|----------|-----|------|----------------------------|
| proportion of GCCR participants without medical diagnostic | ratioER         | 7.32e-01 |     | 0,04 | without IDF an departement |
| proportion of GCCR participants without medical diagnostic | ratioER         | 7.54e-01 |     | 0,07 | without IDF an region      |
| proportion of GCCR participants                            | ratioER         | 1.21e-01 |     | 0,17 | without IDF an departement |
| proportion of GCCR participants                            | ratioER         | 4.13e-01 |     | 0,19 | without IDF an region      |
| proportion of GCCR participants without medical diagnostic | hospital death  | 1.91e-02 |     | 0,25 | without IDF an departement |
| proportion of GCCR participants without medical diagnostic | hospitalization | 1.3e-02  |     | 0,27 | without IDF an departement |
| ratioER                                                    | CCRU admision   | 2.96e-03 |     | 0,32 | without IDF an departement |
| ratioER                                                    | hospitalization | 1.16e-03 |     | 0,34 | without IDF an departement |
| ratioER                                                    | hospital death  | 1.05e-03 |     | 0,35 | without IDF an departement |
| courbatures_GOOGLE                                         | ratioER         | 3.2e-01  |     | 0,38 | without IDF an region      |
| proportion of GCCR participants without medical diagnostic | ratioER         | 8.01e-05 |     | 0,39 | all departement            |
| proportion of GCCR participants                            | hospital death  | 6.42e-05 |     | 0,42 | without IDF an departement |
| proportion of GCCR participants                            | ratioER         | 1.6e-05  |     | 0,42 | all departement            |
| proportion of GCCR participants without medical diagnostic | hospital death  | 5.58e-02 |     | 0,43 | without IDF an region      |
| ratioER                                                    | CCRU admision   | 6.06e-02 |     | 0,43 | without IDF an region      |
| courbatures_GOOGLE                                         | ratioER         | 2.12e-01 |     | 0,43 | all region                 |
| ratioER                                                    | hospital death  | 5.02e-02 |     | 0,44 | without IDF an region      |
| proportion of GCCR participants without medical diagnostic | hospitalization | 4.73e-02 |     | 0,45 | without IDF an region      |
| proportion of GCCR participants without medical diagnostic | ratioER         | 3.43e-02 |     | 0,45 | all region                 |
| proportion of GCCR participants without medical diagnostic | hospital death  | 3.19e-06 |     | 0,46 | all departement            |
| ratioER                                                    | hospitalization | 4.09e-02 |     | 0,46 | without IDF an region      |
| courbatures_GOOGLE                                         | CCRU admision   | 2.16e-01 |     | 0,46 | without IDF an region      |
| proportion of GCCR participants                            | hospitalization | 5.3e-06  |     | 0,47 | without IDF an departement |
| proportion of GCCR participants without medical diagnostic | CCRU admision   | 4.55e-06 |     | 0,47 | without IDF an departement |
| courbatures_GOOGLE                                         | hospitalization | 1.97e-01 |     | 0,47 | without IDF an region      |
| proportion of GCCR participants                            | ratioER         | 2.23e-02 |     | 0,48 | all region                 |
| courbatures_GOOGLE                                         | hospital death  | 1.86e-01 |     | 0,48 | without IDF an region      |
| proportion of GCCR participants                            | hospital death  | 1.86e-07 |     | 0,5  | all departement            |
| proportion of GCCR participants without medical diagnostic | hospitalization | 2.49e-07 |     | 0,5  | all departement            |
| ratioER                                                    | hospital death  | 1.86e-07 |     | 0,5  | all departement            |
| ratioER                                                    | hospitalization | 1.14e-07 |     | 0,51 | all departement            |
| ratioER                                                    | CCRU admision   | 6.9e-08  |     | 0,52 | all departement            |
| proportion of GCCR participants                            | hospitalization | 6.08e-09 |     | 0,55 | all departement            |
| proportion of GCCR participants without medical diagnostic | CCRU admision   | 1.21e-02 |     | 0,55 | without IDF an region      |
| ratioER                                                    | CCRU admision   | 4.82e-03 |     | 0,58 | all region                 |
| ratioER                                                    | hospital death  | 4.97e-03 |     | 0,58 | all region                 |
| perte gout_GOOGLE                                          | ratioER         | 8.1e-02  |     | 0,58 | all region                 |
| perte gout_GOOGLE                                          | ratioER         | 1.01e-01 |     | 0,58 | without IDF an region      |
| perte odorat_GOOGLE                                        | hospital death  | 9.79e-02 |     | 0,59 | without IDF an region      |
| ratioER                                                    | hospitalization | 3.35e-03 |     | 0,6  | all region                 |
| perte odorat_GOOGLE                                        | CCRU admision   | 8.91e-02 |     | 0,6  | without IDF an region      |
| proportion of GCCR participants                            | hospital death  | 3.16e-03 |     | 0,63 | without IDF an region      |
| fièvre_GOOGLE                                              | hospital death  | 7.15e-02 |     | 0,63 | without IDF an region      |
| proportion of GCCR participants                            | CCRU admision   | 2.56e-11 |     | 0,64 | without IDF an departement |
| perte odorat_GOOGLE                                        | hospitalization | 5.52e-02 |     | 0,66 | without IDF an region      |
| courbatures_GOOGLE                                         | hospitalization | 3.4e-02  |     | 0,67 | all region                 |
| courbatures_GOOGLE                                         | CCRU admision   | 3.45e-02 |     | 0,67 | all region                 |
| courbatures_GOOGLE                                         | hospital death  | 3.51e-02 |     | 0,67 | all region                 |
| fièvre_GOOGLE                                              | CCRU admision   | 4.96e-02 |     | 0,67 | without IDF an region      |
| toux_GOOGLE                                                | ratioER         | 4.88e-02 |     | 0,67 | without IDF an region      |
| proportion of GCCR participants                            | hospitalization | 1.03e-03 |     | 0,68 | without IDF an region      |
| proportion of GCCR participants without medical diagnostic | hospital death  | 3.9e-04  |     | 0,69 | all region                 |
| toux_GOOGLE                                                | ratioER         | 2.71e-02 |     | 0,69 | all region                 |
| fièvre_GOOGLE                                              | hospitalization | 3.58e-02 |     | 0,7  | without IDF an region      |
| fièvre_GOOGLE                                              | CCRU admision   | 2.43e-02 |     | 0,7  | all region                 |
| fièvre_GOOGLE                                              | hospital death  | 2.44e-02 |     | 0,7  | all region                 |
| proportion of GCCR participants without medical diagnostic | CCRU admision   | 1.69e-16 |     | 0,72 | all departement            |
| proportion of GCCR participants                            | CCRU admision   | 3.02e-04 |     | 0,72 | without IDF an region      |
| proportion of GCCR participants without medical diagnostic | hospitalization | 8.13e-05 |     | 0,74 | all region                 |
| fièvre_GOOGLE                                              | hospitalization | 1.43e-02 |     | 0,74 | all region                 |
| proportion of GCCR participants                            | hospital death  | 5.62e-05 |     | 0,75 | all region                 |
| proportion of GCCR participants                            | CCRU admision   | 4.16e-19 |     | 0,76 | all departement            |
| toux_GOOGLE                                                | CCRU admision   | 1.08e-02 |     | 0,76 | all region                 |
| perte gout_GOOGLE                                          | CCRU admision   | 1.42e-02 |     | 0,78 | without IDF an region      |
| perte odorat_GOOGLE                                        | hospital death  | 8.23e-03 |     | 0,78 | all region                 |
| perte gout_GOOGLE                                          | hospital death  | 1.12e-02 |     | 0,79 | without IDF an region      |
| perte odorat_GOOGLE                                        | ratioER         | 5.43e-03 |     | 0,8  | all region                 |
| proportion of GCCR participants                            | hospitalization | 5.71e-06 |     | 0,81 | all region                 |
| perte odorat_GOOGLE                                        | CCRU admision   | 3.97e-03 |     | 0,82 | all region                 |
| toux_GOOGLE                                                | CCRU admision   | 7.2e-03  |     | 0,82 | without IDF an region      |
| proportion of GCCR participants without medical diagnostic | CCRU admision   | 1.65e-06 |     | 0,83 | all region                 |
| perte odorat_GOOGLE                                        | hospitalization | 3.07e-03 |     | 0,83 | all region                 |
| toux_GOOGLE                                                | hospital death  | 2.7e-03  |     | 0,83 | all region                 |
| toux_GOOGLE                                                | hospitalization | 2.62e-03 |     | 0,84 | all region                 |
| perte gout_GOOGLE                                          | hospitalization | 3.78e-03 |     | 0,85 | without IDF an region      |
| toux_GOOGLE                                                | hospital death  | 4.01e-03 |     | 0,85 | without IDF an region      |
| proportion of GCCR participants                            | CCRU admision   | 8.95e-08 |     | 0,88 | all region                 |
| perte gout_GOOGLE                                          | CCRU admision   | 7.66e-04 |     | 0,88 | all region                 |
| perte gout_GOOGLE                                          | hospital death  | 7.31e-04 |     | 0,88 | all region                 |
| toux_GOOGLE                                                | hospitalization | 1.85e-03 |     | 0,88 | without IDF an region      |
| fièvre_GOOGLE                                              | ratioER         | 4.55e-04 |     | 0,9  | all region                 |
| fièvre_GOOGLE                                              | ratioER         | 8.67e-04 |     | 0,9  | without IDF an region      |
| perte gout_GOOGLE                                          | hospitalization | 1.74e-04 |     | 0,92 | all region                 |
| perte odorat_GOOGLE                                        | ratioER         | 3.56e-04 |     | 0,92 | without IDF an region      |

1 Supplementary Table 3: National and regional media coverage of the GCCR study in France

| type   | medium          | distribution             | date   | link                                                                                                                                                                        |
|--------|-----------------|--------------------------|--------|-----------------------------------------------------------------------------------------------------------------------------------------------------------------------------|
| presse | BFM TV          | national                 | 14-avr | <a href="https://www.bfmtv.com/sante/coronavirus-une-etude-internationale-lancee-">https://www.bfmtv.com/sante/coronavirus-une-etude-internationale-lancee-</a>             |
| presse | orange          | national                 | 14-avr | <a href="https://actu.orange.fr/france/lancement-d-une-vaste-enquete-sur-la-perde-">https://actu.orange.fr/france/lancement-d-une-vaste-enquete-sur-la-perde-</a>           |
| presse | msn             | national                 | 14-avr | <a href="https://www.msn.com/fr-fr/actualite/coronavirus/coronavirus-une-">https://www.msn.com/fr-fr/actualite/coronavirus/coronavirus-une-</a>                             |
| presse | BFM / RMC       | national                 | 14-avr | <a href="https://rmc.bfmtv.com/emission/un-questionnaire-en-ligne-pour-participer-a-">https://rmc.bfmtv.com/emission/un-questionnaire-en-ligne-pour-participer-a-</a>       |
| presse | femme actuel    | national                 | 14-avr | <a href="https://www.femmeactuelle.fr/sante/news-sante/coronavirus-comment-">https://www.femmeactuelle.fr/sante/news-sante/coronavirus-comment-</a>                         |
| presse | hufftingtonpos  | national                 | 14-avr | <a href="https://www.huffingtonpost.fr/entry/vous-avez-eu-le-coronavirus-aidez-les-">https://www.huffingtonpost.fr/entry/vous-avez-eu-le-coronavirus-aidez-les-</a>         |
| presse | france info     | national                 | 14-avr | <a href="https://www.francetvinfo.fr/sante/maladie/coronavirus/coronavirus-une-">https://www.francetvinfo.fr/sante/maladie/coronavirus/coronavirus-une-</a>                 |
| presse | 20 minutes      | national                 | 14-avr | <a href="https://www.20minutes.fr/sante/2760607-20200414-coronavirus-enquete-">https://www.20minutes.fr/sante/2760607-20200414-coronavirus-enquete-</a>                     |
| presse | nouvel obs      | national                 | 14-avr | <a href="https://www.nouvelobs.com/sante/20200414.OBS27524/coronavirus-perde-">https://www.nouvelobs.com/sante/20200414.OBS27524/coronavirus-perde-</a>                     |
| presse | le Figaro       | national                 | 14-avr | <a href="https://www.lefigaro.fr/flash-actu/covid-19-enquete-internationale-sur-la-">https://www.lefigaro.fr/flash-actu/covid-19-enquete-internationale-sur-la-</a>         |
| presse | CNRS            | national                 | 14-avr | <a href="http://www.cnrs.fr/fr/covid-19-lancement-d-une-enquete-internationale-sur-la-">http://www.cnrs.fr/fr/covid-19-lancement-d-une-enquete-internationale-sur-la-</a>   |
| presse | libération      | national                 | 14-avr | <a href="https://www.liberation.fr/direct/element/une-enquete-internationale-lancee-">https://www.liberation.fr/direct/element/une-enquete-internationale-lancee-</a>       |
| blog   | medisite        | national                 | 14-avr | <a href="https://www.medisite.fr/coronavirus-covid-19-la-perde-du-gout-et-de-lodorat-">https://www.medisite.fr/coronavirus-covid-19-la-perde-du-gout-et-de-lodorat-</a>     |
| blog   | 1001 infos      | national                 | 14-avr | <a href="https://1001infos.net/france/coronavirus-une-enquete-internationale-lancee-">https://1001infos.net/france/coronavirus-une-enquete-internationale-lancee-</a>       |
| blog   | la gazette du   | national                 | 14-avr | <a href="https://www.gazettelabo.fr/breves/9706Covid19-enquete-internationale-">https://www.gazettelabo.fr/breves/9706Covid19-enquete-internationale-</a>                   |
| blog   | myscience       | national                 | 14-avr | <a href="https://www.myscience.fr/news/wire/covid_19_lancement_d_une_enquete_i">https://www.myscience.fr/news/wire/covid_19_lancement_d_une_enquete_i</a>                   |
| blog   | yahoo sport     | national                 | 14-avr | <a href="https://fr.sports.yahoo.com/news/coronavirus-enqu%C3%AAta-scientifique-">https://fr.sports.yahoo.com/news/coronavirus-enqu%C3%AAta-scientifique-</a>               |
| blog   | le blob         | national                 | 14-avr | <a href="https://leblob.fr/actualites/covid-19-une-enquete-mondiale-pour-decrire-">https://leblob.fr/actualites/covid-19-une-enquete-mondiale-pour-decrire-</a>             |
| blog   | lactu24         | national                 | 14-avr | <a href="https://lactu24.com/26376-2/">https://lactu24.com/26376-2/</a>                                                                                                     |
| radio  | radio scoop     | Auvergne / R             | 14-avr | <a href="https://radioscoop.com/infos/participez-a-une-enquete-sur-la-perde-de-l-">https://radioscoop.com/infos/participez-a-une-enquete-sur-la-perde-de-l-</a>             |
| presse | lyonmag         | Rhône-Alpes              | 14-avr | <a href="https://www.lyonmag.com/article/106956/coronavirus-une-etude-sur-la-perde-">https://www.lyonmag.com/article/106956/coronavirus-une-etude-sur-la-perde-</a>         |
| radio  | impact fm       | Rhône-Alpes              | 14-avr | <a href="https://www.impactfm.fr/infos/participez-a-une-enquete-sur-la-perde-de-l-">https://www.impactfm.fr/infos/participez-a-une-enquete-sur-la-perde-de-l-</a>           |
| presse | lyon capitale   | Rhône-Alpes              | 14-avr | <a href="https://www.lyoncapitale.fr/actualite/coronavirus-lyon-participe-a-une-">https://www.lyoncapitale.fr/actualite/coronavirus-lyon-participe-a-une-</a>               |
| presse | la depeche du   | Languedoc-Ro             | 14-avr | <a href="https://www.ladepeche.fr/2020/04/14/covid-19-enquete-internationale-sur-la-">https://www.ladepeche.fr/2020/04/14/covid-19-enquete-internationale-sur-la-</a>       |
| presse | golfe de St Tr  | PACA                     | 14-avr | <a href="https://golfedesainttropez.maville.com/actu/actudet_-coronavirus-une-">https://golfedesainttropez.maville.com/actu/actudet_-coronavirus-une-</a>                   |
| presse | ma ville drag   | PACA                     | 14-avr | <a href="https://draquignan.maville.com/actu/actudet_-coronavirus-une-enquete-">https://draquignan.maville.com/actu/actudet_-coronavirus-une-enquete-</a>                   |
| presse | brignoles - m   | PACA                     | 14-avr | <a href="https://brignoles.maville.com/actu/actudet_-coronavirus-une-enquete-">https://brignoles.maville.com/actu/actudet_-coronavirus-une-enquete-</a>                     |
| presse | la provence     | PACA                     | 14-avr | <a href="https://www.laprovence.com/article/sante/5961521/covid-19-enquete-">https://www.laprovence.com/article/sante/5961521/covid-19-enquete-</a>                         |
| blog   | cres PACA       | PACA                     | 14-avr | <a href="http://www.cres-">http://www.cres-</a>                                                                                                                             |
| presse | ouest france    | Bretagne / Ce            | 14-avr | <a href="https://www.ouest-france.fr/sante/virus/coronavirus/coronavirus-une-">https://www.ouest-france.fr/sante/virus/coronavirus/coronavirus-une-</a>                     |
| presse | sante magazin   | national                 | 15-avr | <a href="https://www.santemagazine.fr/actualites/actualites-sante/coronavirus-une-">https://www.santemagazine.fr/actualites/actualites-sante/coronavirus-une-</a>           |
| presse | notre temps     | national                 | 15-avr | <a href="https://www.notretemps.com/sante/covid-19-enquete-internationale-sur-la-">https://www.notretemps.com/sante/covid-19-enquete-internationale-sur-la-</a>             |
| presse | latribune       | national                 | 15-avr | <a href="https://www.latribune.ca/covid-19/participants-recherches-pour-une-">https://www.latribune.ca/covid-19/participants-recherches-pour-une-</a>                       |
| presse | science et ave  | national                 | 15-avr | <a href="https://www.sciencesetavenir.fr/sante/coronavirus-le-point-du-jour-sur-le-">https://www.sciencesetavenir.fr/sante/coronavirus-le-point-du-jour-sur-le-</a>         |
| blog   | technoscience   | national                 | 15-avr | <a href="https://www.techno-science.net/actualite/covid-19-lancement-enquete-">https://www.techno-science.net/actualite/covid-19-lancement-enquete-</a>                     |
| blog   | presse19        | national                 | 15-avr | <a href="http://presse19.centerblog.net/4098-etude-internationale-sur-la-perde-de-">http://presse19.centerblog.net/4098-etude-internationale-sur-la-perde-de-</a>           |
| radio  | tonic radio     | Rhône-Alpes              | 15-avr | <a href="https://www.tonicradio.fr/covid-19-une-etude-lancee-face-a-la-perde-dodorat-">https://www.tonicradio.fr/covid-19-une-etude-lancee-face-a-la-perde-dodorat-</a>     |
| presse | centre jacques  | Rhône-Alpes              | 15-avr | <a href="https://centrefrancis.com/actualites/detail/actu/covid-19-traitements-">https://centrefrancis.com/actualites/detail/actu/covid-19-traitements-</a>                 |
| presse | france region   | Rhône-Alpes              | 15-avr | <a href="https://france3-regions.francetvinfo.fr/auvergne-rhone-alpes/coronavirus-">https://france3-regions.francetvinfo.fr/auvergne-rhone-alpes/coronavirus-</a>           |
| radio  | KISS FM         | PACA                     | 15-avr | <a href="http://www.kissfm.fr/page.asp?id=90">http://www.kissfm.fr/page.asp?id=90</a>                                                                                       |
| presse | france 3 PACA   | PACA                     | 15-avr | <a href="https://france3-regions.francetvinfo.fr/provence-alpes-cote-d-">https://france3-regions.francetvinfo.fr/provence-alpes-cote-d-</a>                                 |
| TV     | france 3 PACA   | PACA                     | 15-avr | <a href="https://france3-regions.francetvinfo.fr/provence-alpes-cote-d-">https://france3-regions.francetvinfo.fr/provence-alpes-cote-d-</a>                                 |
| presse | futurasciences  | national                 | 16-avr | <a href="https://www.futura-sciences.com/sante/breves/coronavirus-covid-19-">https://www.futura-sciences.com/sante/breves/coronavirus-covid-19-</a>                         |
| presse | yahoo           | national                 | 16-avr | <a href="https://fr.news.yahoo.com/covid-19-participez-%C3%A0-enqu%C3%AAta-">https://fr.news.yahoo.com/covid-19-participez-%C3%A0-enqu%C3%AAta-</a>                         |
| blog   | anosmie.org     | national                 | 16-avr | <a href="https://www.anosmie.org/2020/04/16/enquetes-publiques-etudes-cliniques-">https://www.anosmie.org/2020/04/16/enquetes-publiques-etudes-cliniques-</a>               |
| presse | Le Monde        | national                 | 20-avr | <a href="https://www.lemonde.fr/sciences/article/2020/04/20/combien-de-cas-de-">https://www.lemonde.fr/sciences/article/2020/04/20/combien-de-cas-de-</a>                   |
| radio  | France inter    | national                 | 17-avr | <a href="https://www.franceinter.fr/environnement/detox-la-perde-du-gout-et-de-l-">https://www.franceinter.fr/environnement/detox-la-perde-du-gout-et-de-l-</a>             |
| radio  | RCF             | national                 | 17-avr | <a href="https://rcf.fr/la-matinale/trois-questions-jerome-golebiowski">https://rcf.fr/la-matinale/trois-questions-jerome-golebiowski</a>                                   |
| blog   | pourquoi doct   | national                 | 17-avr | <a href="https://www.pourquidocteur.fr/Articles/Question-d-actu/32168-Coronavirus-">https://www.pourquidocteur.fr/Articles/Question-d-actu/32168-Coronavirus-</a>           |
| radio  | RFI             | national                 | 20-avr | <a href="http://www.rfi.fr/ru/%D1%84%D1%80%D0%B0%D0%BD%D1%86%D0%B8">http://www.rfi.fr/ru/%D1%84%D1%80%D0%B0%D0%BD%D1%86%D0%B8</a>                                           |
| presse | top santé       | national                 | 20-avr | <a href="https://www.topsante.com/medecine/maladies-">https://www.topsante.com/medecine/maladies-</a>                                                                       |
| presse | inrae           | national                 | 20-avr | <a href="https://www.inrae.fr/covid-19">https://www.inrae.fr/covid-19</a>                                                                                                   |
| blog   | nez - la revue  | national                 | 21-avr | <a href="https://www.nez-larevue.fr/magazine/actualites/covid-19-le-jour-ou-le-monde-">https://www.nez-larevue.fr/magazine/actualites/covid-19-le-jour-ou-le-monde-</a>     |
| presse | UCA             | PACA                     | 21-avr | <a href="http://univ-cotedazur.fr/contenus-riches/actualites/fr/covid-19-lancement-">http://univ-cotedazur.fr/contenus-riches/actualites/fr/covid-19-lancement-</a>         |
| blog   | breakingnews    | national                 | 22-avr | <a href="https://www.breakingnews.fr/sante/avez-vous-perdu-lodeur-ou-le-gout-des-">https://www.breakingnews.fr/sante/avez-vous-perdu-lodeur-ou-le-gout-des-</a>             |
| blog   | seronet         | national                 | 23-avr | <a href="https://seronet.info/breve/enquete-sur-la-perde-de-lodorat-et-du-gout-87429">https://seronet.info/breve/enquete-sur-la-perde-de-lodorat-et-du-gout-87429</a>       |
| presse | actu toulouse   | Midi-Pyrénées            | 23-avr | <a href="https://actu.fr/occitanie/toulouse_31555/toulouse-perde-gout-de-lodorat-">https://actu.fr/occitanie/toulouse_31555/toulouse-perde-gout-de-lodorat-</a>             |
| presse | france3 region  | Languedoc-Ro             | 27-avr | <a href="https://france3-regions.francetvinfo.fr/occitanie/haute-">https://france3-regions.francetvinfo.fr/occitanie/haute-</a>                                             |
| blog   | CPU             | national                 | 02-mai | <a href="http://www.cpu.fr/actualite/covid-19-la-piste-du-gout-et-de-lodorat/">http://www.cpu.fr/actualite/covid-19-la-piste-du-gout-et-de-lodorat/</a>                     |
| presse | tribune de Lyo  | Rhône-Alpes              | 03-mai | <a href="https://tribunedelyon.fr/salade-lyonnaise/article/sommeil-et-confinement-">https://tribunedelyon.fr/salade-lyonnaise/article/sommeil-et-confinement-</a>           |
| presse | nice matin      | PACA                     | 03-mai | <a href="https://www.pressreader.com/france/nice-matin-nice-littoral-et-">https://www.pressreader.com/france/nice-matin-nice-littoral-et-</a>                               |
| presse | doctissimo      | national                 | ?      | <a href="https://www.doctissimo.fr/sante/news/coronavirus-enquete-internationale-">https://www.doctissimo.fr/sante/news/coronavirus-enquete-internationale-</a>             |
| blog   | crumpe          | national                 | ?      | <a href="https://www.crumpe.com/2020/04/une-enquete-scientifique-internationale-">https://www.crumpe.com/2020/04/une-enquete-scientifique-internationale-</a>               |
| presse | cnrs occitanie  | Languedoc-Ro             | ?      | <a href="https://www.cnrs.fr/occitanie-ouest/actualites/article/alerte-presse-covid-19-">https://www.cnrs.fr/occitanie-ouest/actualites/article/alerte-presse-covid-19-</a> |
| blog   | alternatif bien | national                 | ?      | <a href="https://alternatif-bien-etre.com/urgence-sante-coronavirus/des-chercheurs-">https://alternatif-bien-etre.com/urgence-sante-coronavirus/des-chercheurs-</a>         |
| presse | univ Lyon       | Rhône-Alpes              | ?      | <a href="https://popsciences.universite-lyon.fr/ressources/covid-19-odorat-et-qualite-">https://popsciences.universite-lyon.fr/ressources/covid-19-odorat-et-qualite-</a>   |
| presse | cnrs centre es  | Alsace / Champagne-Arden | ?      | <a href="http://www.dr6.cnrs.fr/centre-est/spip.php?rubrique26">http://www.dr6.cnrs.fr/centre-est/spip.php?rubrique26</a>                                                   |
| presse | cnrs bretagne   | Bretagne / Pa            | ?      | <a href="https://www.dr17.cnrs.fr/">https://www.dr17.cnrs.fr/</a>                                                                                                           |
| presse | cnrs aquitaine  | Aquitaine                | ?      | <a href="http://www.cnrs.fr/aquitaine/">http://www.cnrs.fr/aquitaine/</a>                                                                                                   |
| presse | SCF             | national                 | ?      | <a href="https://www.societechimiquedefrance.fr/Le-milieu-academique-se-mobilise-">https://www.societechimiquedefrance.fr/Le-milieu-academique-se-mobilise-</a>             |
